## A pooled multi-national validation study of a machine learning, high-sensitivity troponin-based multi-proteomic model to predict the presence of obstructive coronary artery disease

J.T. Neumann<sup>1</sup>, N.A. Sorenson<sup>1</sup>, C.P. McCarthy<sup>2</sup>, C.A. Magaret<sup>3</sup>, R.F. Rhyne<sup>3</sup>, C.C. Peters<sup>3</sup>, G. Barnes<sup>3</sup>, C.R. Defilippi<sup>4</sup>, D. Westermann<sup>1</sup>, J.L. Januzzi<sup>2</sup>

<sup>1</sup>University Heart & Vascular Center Hamburg, Cardiology, Hamburg, Germany, Germany; <sup>2</sup>Massachusetts General Hospital, Medicine, Division of Cardiology, Boston, United States of America; <sup>3</sup>Prevencio, Inc., Kirkland, United States of America; <sup>4</sup>Inova Heart and Vascular Institute, Falls Church, VA, United States of America

**Funding Acknowledgement:** Type of funding sources: Private company. Main funding source(s): Prevencio, Inc.

**Background:** Undetected obstructive coronary artery disease (oCAD) is a global health problem associated with significant morbidity and mortality. A need exists for an accurate and easily accessible diagnostic test for oCAD. Using machine learning, a multi-biomarker blood diagnostic test for oCAD based on high-sensitivity cardiac troponin-I (hs-cTnI) has been developed.

**Purpose:** To validate the performance of a previously developed, algorithmically weighted, multiple protein diagnostic panel to diagnose oCAD in a pooled multi-national cohort and to compare the diagnostic panel's performance to predict oCAD to hs-cTnI alone.

**Methods:** Three clinical factors (sex, age, and previous coronary percutaneous intervention) and three biomarkers (hs-cTnI, Adiponectin, and Kidney Injury Molecule-1) were combined. hs-cTnI blood samples were assayed on the Siemens Atellica and Abbott Diagnostics ARCHITECT immunoassay platforms. Adiponectin and Kidney Injury Molecule-1 were measured with a multiplex assay on blood samples via the Luminex 100/200 xMAP platform. Individual data from a total of 924 patients with a mixture of acute and lesser acute presentations from three centers were

pooled (Table 1). oCAD was defined as >50% coronary obstruction in at least one coronary artery (for the University Hospital Hamburg-Eppendorf cohort) or >70% coronary obstruction in at least one coronary artery (for the other two cohorts). The multiple biomarker diagnostic panel's performance to predict oCAD was also compared to hs-cTnI alone.

**Results:** The multiple protein panel had an area under the receiver-operating characteristic curve of 0.80 (95% CI, 0.77, 0.83,  $p < 0.001$ ) for the presence of oCAD (Figure 1). At optimal cutoff, the score had 74% sensitivity, 72% specificity, and a positive predictive value of 81% for oCAD. The multiple biomarker panel had a diagnostic odds ratio of 7.48 (95% CI 5.55, 10.09,  $p < 0.001$ ). In comparison, in patients without an acute MI, hs-cTnI alone had an area under the receiver-operating characteristic curve of 0.63 (95% CI, 0.60, 0.67,  $p < 0.001$ ) for oCAD (Figure 1).

**Conclusions:** In this multinational pooled cohort, a previously described novel machine learning, multiple biomarker panel provided high accuracy to diagnose patients for oCAD.

|                                  | CASABLANCA Validation Set (n = 275) |                      |           | BACC (n = 241)       |                      |           | Inova (n = 408)      |                     |           | All Patients (n = 924) |                     |           |
|----------------------------------|-------------------------------------|----------------------|-----------|----------------------|----------------------|-----------|----------------------|---------------------|-----------|------------------------|---------------------|-----------|
|                                  | With CAD (n=177)                    | Without CAD (n=98)   | p-value   | With CAD (n=199)     | Without CAD (n=42)   | p-value   | With CAD (n=197)     | Without CAD (n=211) | p-value   | With CAD (n=573)       | Without CAD (n=351) | p-value   |
| <b>Demographics</b>              |                                     |                      |           |                      |                      |           |                      |                     |           |                        |                     |           |
| Age                              | 67.949 (11.555)                     | 65.5 (11.86)         | p = 0.1   | 64.976 (13.179)      | 61.119 (13.459)      | p = 0.091 | 68.604 (9.924)       | 64.888 (12.516)     | p < 0.001 | 67.487 (11.619)        | 64.608 (12.487)     | p < 0.001 |
| Sex Is Male                      | 143 / 177 (80.8%)                   | 54 / 98 (55.1%)      | p < 0.001 | 187 / 245 (76.3%)    | 22 / 42 (52.4%)      | p = 0.002 | 149 / 197 (75.6%)    | 125 / 211 (59.2%)   | p < 0.001 | 439 / 573 (76.6%)      | 201 / 351 (57.3%)   | p < 0.001 |
| BMI                              | 28.841 (5.205)                      | 28.009 (5.752)       | p = 0.236 | 27.35 (5.074)        | 27.377 (4.718)       | p = 0.974 | 31.119 (24.039)      | 30.598 (7.979)      | p = 0.773 | 29.145 (14.771)        | 29.502 (7.212)      | p = 0.625 |
| Current smoker                   | 28 / 175 (16%)                      | 11 / 97 (11.3%)      | p = 0.367 | 82 / 245 (33.5%)     | 10 / 42 (23.8%)      | p = 0.283 | 16 / 197 (8.1%)      | 15 / 211 (7.1%)     | p = 0.713 | 104 / 571 (18.2%)      | 36 / 350 (10.3%)    | p = 0.001 |
| <b>Medical History</b>           |                                     |                      |           |                      |                      |           |                      |                     |           |                        |                     |           |
| Hypertension                     | 129 / 177 (72.9%)                   | 69 / 98 (70.4%)      | p = 0.676 | 188 / 243 (77.4%)    | 25 / 41 (61%)        | p = 0.032 | 161 / 197 (81.7%)    | 145 / 211 (68.7%)   | p = 0.003 | 451 / 571 (79%)        | 239 / 350 (68.3%)   | p < 0.001 |
| Hyperlipoproteinemia             | 127 / 177 (71.8%)                   | 53 / 98 (54.1%)      | p = 0.004 | 126 / 245 (51.4%)    | 14 / 42 (33.3%)      | p = 0.044 | 154 / 197 (78.2%)    | 120 / 211 (56.9%)   | p < 0.001 | 395 / 573 (68.9%)      | 187 / 351 (53.3%)   | p < 0.001 |
| CAD/CAGB/PCI                     | 144 / 177 (81.4%)                   | 31 / 98 (31.6%)      | p < 0.001 | 111 / 245 (45.3%)    | 2 / 42 (4.8%)        | p < 0.001 | 108 / 197 (54.8%)    | 60 / 211 (28.4%)    | p < 0.001 | 356 / 573 (62.1%)      | 93 / 351 (26.5%)    | p < 0.001 |
| Prior MI                         | 47 / 177 (26.6%)                    | 15 / 98 (15.3%)      | p = 0.035 | 60 / 245 (24.5%)     | 2 / 42 (4.8%)        | p = 0.002 | 54 / 197 (27.4%)     | 16 / 211 (7.6%)     | p < 0.001 | 158 / 573 (27.6%)      | 33 / 351 (9.4%)     | p < 0.001 |
| Congestive heart failure         | 34 / 177 (19.2%)                    | 21 / 98 (21.4%)      | p = 0.753 | 44 / 245 (18%)       | 9 / 42 (21.4%)       | p = 0.667 | 37 / 197 (18.8%)     | 44 / 210 (21%)      | p = 0.62  | 111 / 573 (19.4%)      | 74 / 350 (21.1%)    | p = 0.553 |
| Peripheral artery disease        | 38 / 177 (21.5%)                    | 9 / 98 (9.2%)        | p = 0.012 | 29 / 245 (11.8%)     | 0 / 42 (0%)          | p = 0.012 | 26 / 197 (13.2%)     | 10 / 211 (4.7%)     | p = 0.003 | 90 / 573 (15.7%)       | 19 / 351 (5.4%)     | p < 0.001 |
| Family history of CAD            | 81 / 177 (45.8%)                    | 26 / 98 (26.5%)      | p = 0.003 | 63 / 239 (26.4%)     | 9 / 40 (22.5%)       | p = 0.699 | 76 / 195 (39%)       | 70 / 210 (33.3%)    | p = 0.255 | 208 / 567 (36.7%)      | 105 / 348 (30.2%)   | p = 0.075 |
| <b>Medication Use</b>            |                                     |                      |           |                      |                      |           |                      |                     |           |                        |                     |           |
| Antiplatelet                     | 153 / 177 (86.4%)                   | 58 / 98 (59.2%)      | p < 0.001 | 113 / 229 (49.3%)    | 12 / 40 (30%)        | p = 0.026 | 127 / 163 (77.9%)    | 134 / 169 (79.3%)   | p = 0.79  | 451 / 572 (78.8%)      | 206 / 351 (58.7%)   | p < 0.001 |
| Hypertension                     | 151 / 177 (85.3%)                   | 84 / 98 (85.7%)      | p = 1     | 151 / 229 (65.9%)    | 26 / 40 (65%)        | p = 1     | 114 / 163 (69.9%)    | 128 / 169 (75.7%)   | p = 0.267 | 446 / 571 (78.1%)      | 237 / 351 (67.5%)   | p < 0.001 |
| Hyperlipoproteinemia             | 142 / 177 (80.2%)                   | 63 / 98 (64.3%)      | p = 0.006 | 72 / 227 (31.7%)     | 7 / 38 (18.4%)       | p = 0.125 | 114 / 163 (69.9%)    | 120 / 169 (71%)     | p = 0.904 | 380 / 567 (67%)        | 195 / 350 (55.7%)   | p < 0.001 |
| Anti-diabetics                   | 30 / 177 (16.9%)                    | 14 / 98 (14.3%)      | p = 0.61  | 46 / 233 (19.7%)     | 4 / 40 (10%)         | p = 0.185 | 20 / 55 (36.4%)      | 22 / 48 (45.8%)     | p = 0.422 | 102 / 454 (22.5%)      | 38 / 189 (20.1%)    | p = 0.531 |
| <b>Protein Concentrations</b>    |                                     |                      |           |                      |                      |           |                      |                     |           |                        |                     |           |
| Adiponectin (ug/mL)              | 3.9 (2.3, 5.9)                      | 4.3 (2.9, 7.45)      | p = 0.03  | 4.6 (3, 7.6)         | 7.15 (4.4, 9.55)     | p = 0.007 | 4.2 (3, 7.4)         | 4.5 (3, 7.5)        | p = 0.711 | 4 (2.6, 6.6)           | 5 (3.2, 8.4)        | p < 0.001 |
| Kidney Injury Molecule-1 (ng/mL) | 0.043 (0.015, 0.085)                | 0.031 (0.015, 0.054) | p = 0.009 | 0.024 (0.024, 0.073) | 0.051 (0.024, 0.074) | p = 0.52  | 0.024 (0.024, 0.068) | 0.024 (0.024, 0.05) | p = 0.059 | 0.034 (0.024, 0.079)   | 0.024 (0.024, 0.05) | p < 0.001 |
| Tn-I (pg/mL)                     | 10.3 (4, 110.6)                     | 6.2 (3.1, 20.8)      | p = 0.002 | 37.9 (9.6, 539.8)    | 26.35 (9.125, 114.5) | p = 0.376 | 6.9 (5.15, 11.75)    | 7.1 (5.3, 12.1)     | p = 0.529 | 11.6 (5.6, 69.2)       | 7 (4.6, 13.85)      | p < 0.001 |

Table 1. Pooled Variable Data

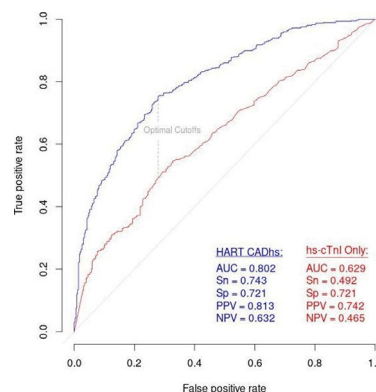

Figure 1. ROC for HART CADhs and hs-cTnI
